# Supplementary material for: Polymorphism detection of DGAT1 and Lep genes in Anatolian water buffalo (Bubalus bubalis) populations in Turkey
Source: PubMed Central journal article supplement (PMC8738919; doi:10.5194/aab-65-1-2022), 2022-01-03
Supplement: aab-65-1-supplement.pdf [file aab-65-1-supplement.pdf]

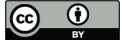

*Supplement of*

## **Polymorphism detection of *DGAT1* and *Lep* genes in Anatolian water buffalo (*Bubalus bubalis*) populations in Turkey**

**Raziye Işık et al.**

*Correspondence to:* Raziye Işık (risik@nku.edu.tr) and Emel Özkan Ünal (ozemel@nku.edu.tr)

The copyright of individual parts of the supplement might differ from the article licence.

| <b>Location</b> | <b>Nucleotide change</b> | <b>NCBI Accession Number</b> | <b>Sex</b> | <b>Age</b> |
|-----------------|--------------------------|------------------------------|------------|------------|
| 46              | C/G                      | MZ230555                     | Female     | 3          |
| 51              | T/C                      | MZ230555                     | Male       | 6          |
| 52              | C/G                      | MZ230556                     | Male       | 12         |
| 56              | T/C                      | MZ230556                     | Female     | 15         |
| 164             | A/G/R                    | MZ230557                     | Female     | 3          |
| 167             | G/A                      | MZ230557                     | Male       | 30         |
| 186             | A/G                      | MZ230558                     | Male       | 18         |
| 210             | G/A                      | MZ230558                     | Female     | 34         |
| 221             | T/C                      | MZ230559                     | Female     | 19         |
| 284             | G/A                      | MZ230559                     | Female     | 4          |
| 287             | G/A/R                    | MZ230560                     | Female     | 28         |
| 302             | G/A                      | MZ230558                     | Male       | 23         |
| 308             | T/C                      | MZ230561                     | Female     | 6          |
| 318             | T/C                      | MZ230560                     | Female     | 32         |
| 323             | C/Y                      | MZ230562                     | Female     | 12         |
| 326             | C/Y                      | MZ230556                     | Male       | 16         |
| 338             | C/Y                      | MZ230563                     | Female     | 21         |
| 377             | G/A                      | MZ230564                     | Male       | 3          |
| 386             | A/T                      | MZ230557                     | Female     | 24         |
| 403             | G/A/R                    | MZ230559                     | Male       | 15         |
| 419             | T/C                      | MZ230561                     | Male       | 33         |
| 422             | T/Y                      | MZ230555                     | Female     | 4          |
| 489             | C/T                      | MZ230562                     | Male       | 20         |
| 490             | A/G                      | MZ230557                     | Female     | 11         |
| 504             | C/Y                      | MZ230563                     | Male       | 3          |
| 549             | C/T                      | MZ230556                     | Female     | 12         |
| 562             | T/C/Y                    | MZ230565                     | Female     | 10         |
| 586             | C/T                      | MZ230558                     | Female     | 6          |
| 587             | G/R                      | MZ230561                     | Female     | 17         |
| 616             | A/G                      | MZ230564                     | Female     | 26         |
| 622             | C/T                      | MZ230562                     | Male       | 3          |
| 630             | A/G                      | MZ230559                     | Female     | 22         |
| 656             | G/C                      | MZ230560                     | Male       | 12         |
| 662             | C/T                      | MZ230563                     | Male       | 25         |
| 663             | G/R                      | MZ230555                     | Female     | 4          |
| 678             | A/G                      | MZ230565                     | Male       | 20         |
| 694             | C/G                      | MZ230560                     | Female     | 26         |
| 707             | C/G                      | MZ230558                     | Female     | 14         |
